# Supplementary material for: In Situ Grown Mesoporous Structure of Fe-Dopant@NiCoOX@NF Nanoneedles as an Efficient Supercapacitor Electrode Material
Source: MDPI journal article supplement (doi:10.3390/nano13020292), 2023-01-10
Supplement: s1 [file s1]

## Supplementary Materials

# In Situ Grown Mesoporous Structure of Fe-Dopant@NiCoO<sub>x</sub>@NF Nanoneedles as an Efficient Supercapacitor Electrode Material

Yedluri Anil Kumar <sup>1,2,†</sup>, Ganesh Koyyada <sup>3,†</sup>, Dasha Kumar Kulurumotlakatla <sup>4</sup>, Jae Hong Kim <sup>3</sup>, Md Moniruzzaman <sup>5,\*</sup>, Salem Alzahmi <sup>1,2,\*</sup> and Ihab M. Obaidat <sup>2,6,\*</sup>

- <sup>1</sup> Department of Chemical & Petroleum Engineering, United Arab Emirates University, Al Ain-15551, United Arab Emirates; yedluri.anil@gmail.com  
<sup>2</sup> National Water and Energy Center, United Arab Emirates University, Al Ain 15551, United Arab Emirates  
<sup>3</sup> Department of Chemical Engineering, Yeungnam University, 214-1, Daehak-ro 280, Gyeongsan 712-749, Gyeongbuk-do, Republic of Korea; ganeshkoyyada@gmail.com (G.K.); jaehkim@ynu.ac.kr (J.H.K.)  
<sup>4</sup> Graduate School of Convergence Science, Pusan National University, San 30 Jangjeon-dong, Geumjeong-gu, Busan 609-735, Republic of Korea; dashakumar1212@gmail.com  
<sup>5</sup> Department of Chemical and Biological Engineering, Gachon University, 1342 Seongnam-daero, Seongnam-si, Gyeonggi-do 13120, Republic of Korea  
<sup>6</sup> Department of Physics, United Arab Emirates University, Al Ain 15551, United Arab Emirates  
\* Correspondence: mani57chem@gachon.ac.kr (M.M.); s.alzahmi@uaeu.ac.ae (S.A.); iobaidat@uaeu.ac.ae (I.M.O.)  
† These authors contributed equally to this work.

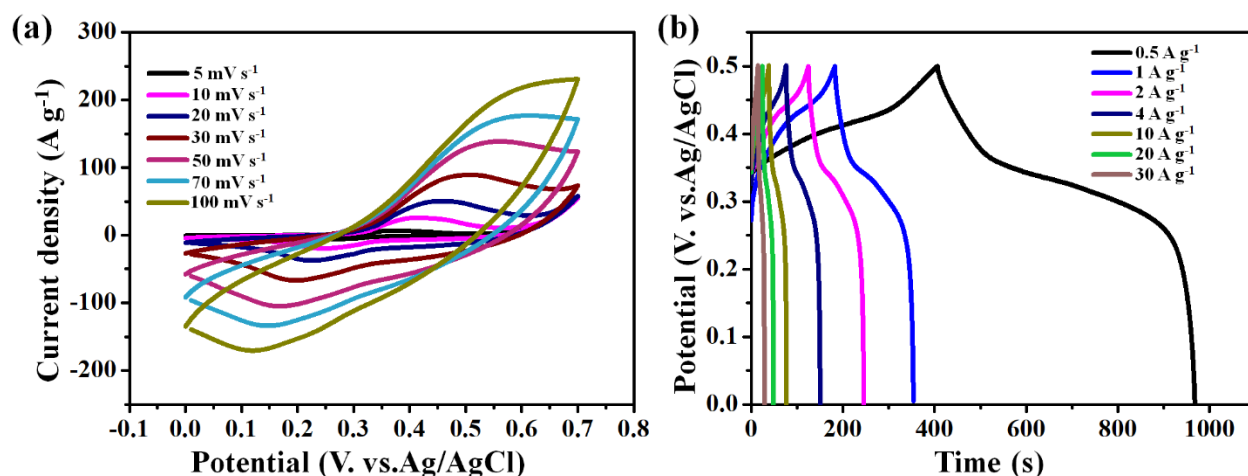

**Figure S1.** Electrochemical characteristic of the as-synthesized electrodes at a three-electrode system: (a) Full CV tests for NiCoO<sub>x</sub>@NF nanowires electrode at several applied scan rates, and (b) Full GCD tests for NiCoO<sub>x</sub>@NF nanowires electrode at several applied currents.
